# Supplementary material for: A benchmark of transposon insertion detection tools using real data
Source: PubMed Central journal article supplement (PMC6937713; doi:10.1186/s13100-019-0197-9), 2019-12-30

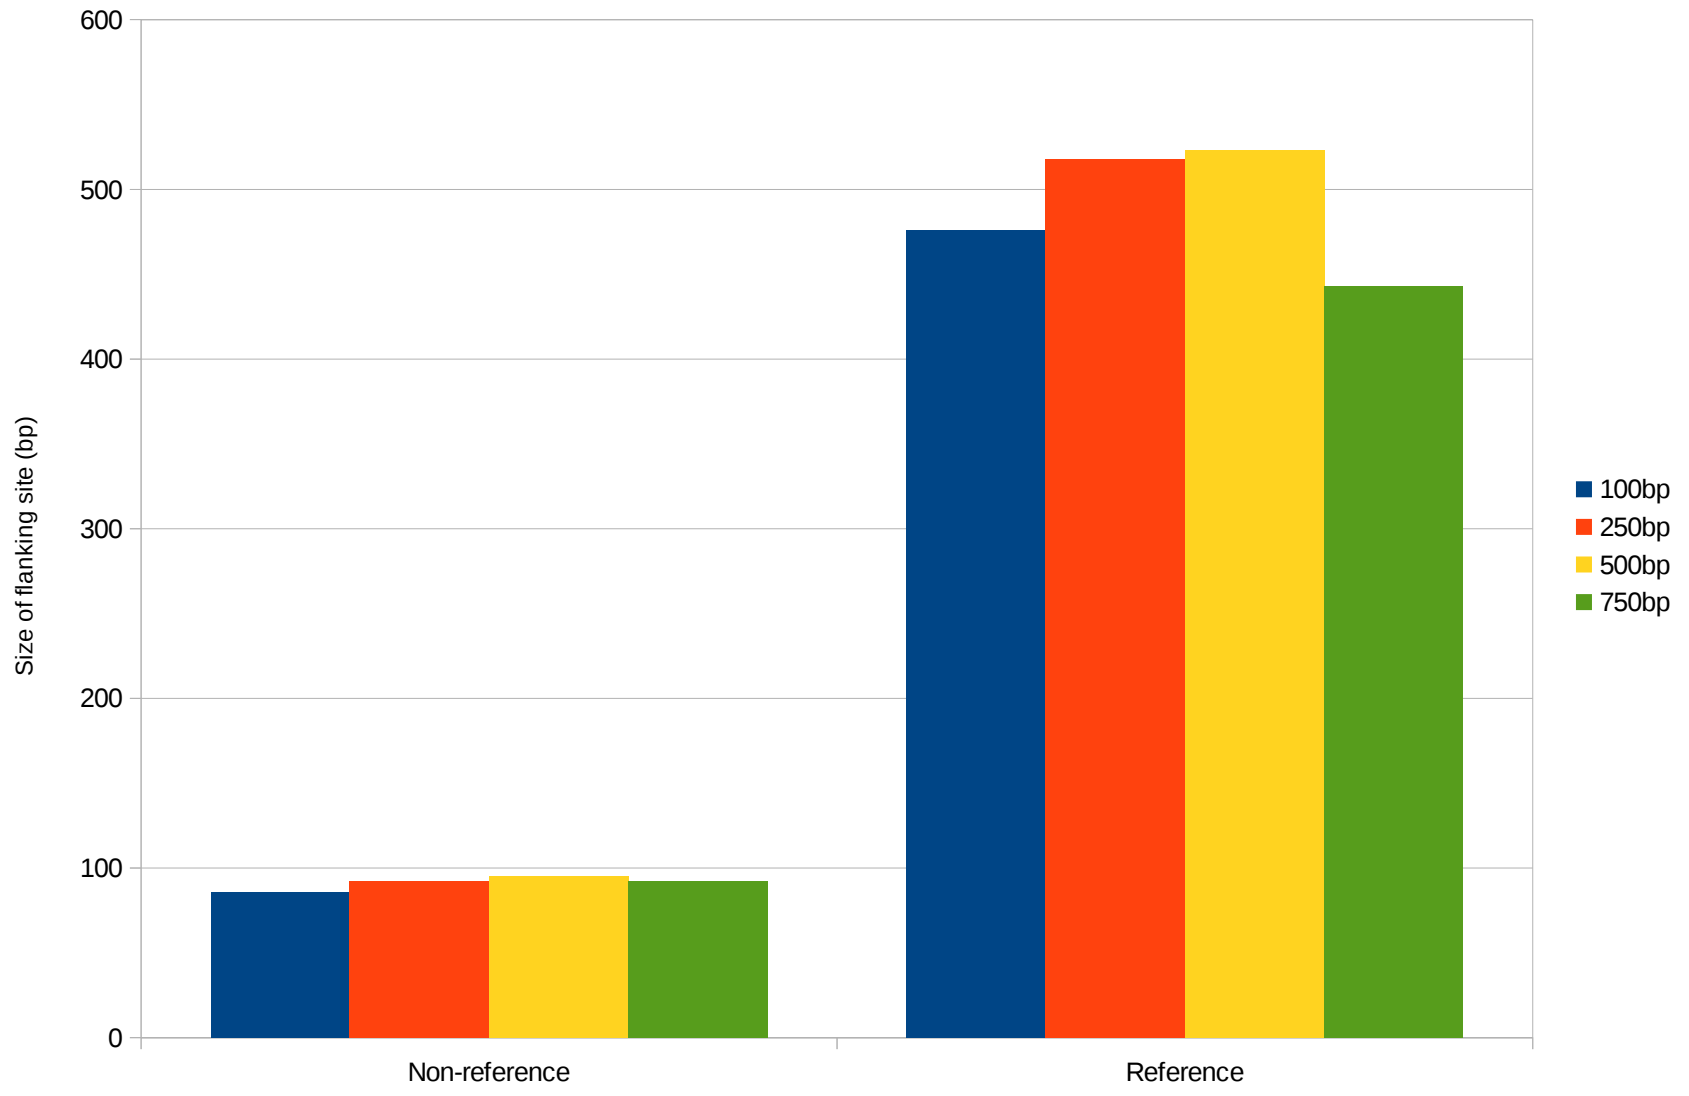

Supplement: 13100_2019_197_MOESM6_ESM.pdf [file 13100_2019_197_MOESM6_ESM.pdf]
